# Supplementary material for: Tunable hollow mesoporous organosilica for efficient adsorption of heavy metal ions from water
Source: Royal Society of Chemistry journal article supplement (doi:10.1039/d4qi00772g), 2024-01-01
Supplement: d4qi00772g1.pdf [file d4qi00772g1.pdf]

## Supporting Information

### **Tunable Hollow Mesoporous Organosilica for Efficient Adsorption of Heavy Metal Ions from Water**

Meng Cheng<sup>a</sup>, Yuqi Liu<sup>a</sup>, Hao Jiang<sup>a</sup>, Chunling Li<sup>a, b\*</sup>, Shuangqing Sun<sup>a, b</sup>, Songqing Hu<sup>a, b\*</sup>

Corresponding author E-mail address: [songqinghu@upc.edu.cn](mailto:songqinghu@upc.edu.cn), [lichunling@upc.edu.cn](mailto:lichunling@upc.edu.cn)

<sup>a</sup> School of Materials Science and Engineering, China University of Petroleum (East China), Qingdao 266580, China.

<sup>b</sup> Institute of Advanced Materials, China University of Petroleum (East China), Qingdao 266580, China.

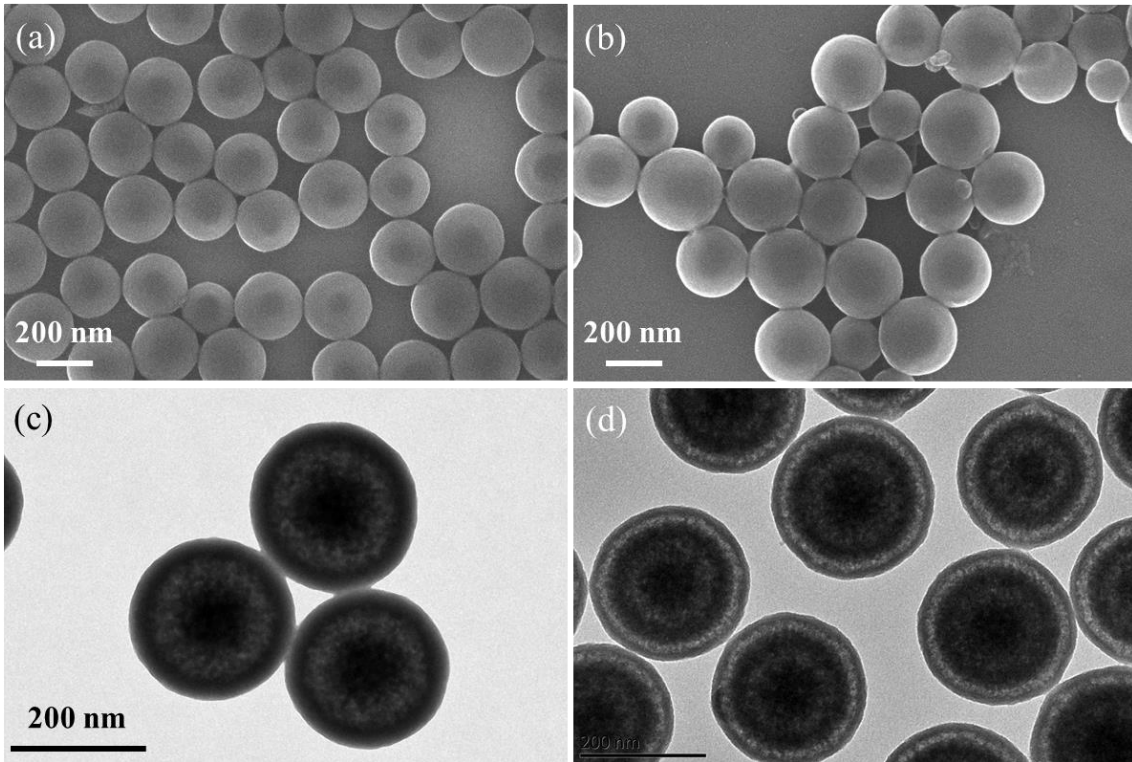

Fig. S1 SEM (a, b) and TEM (c, d) of S-M-HPMO and D-M-HPMO.

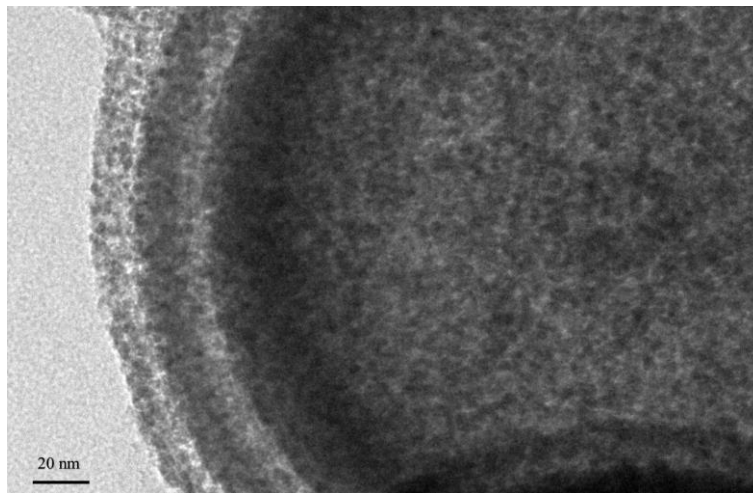

Fig. S2 The high-resolution TEM of T-P-HPMO.

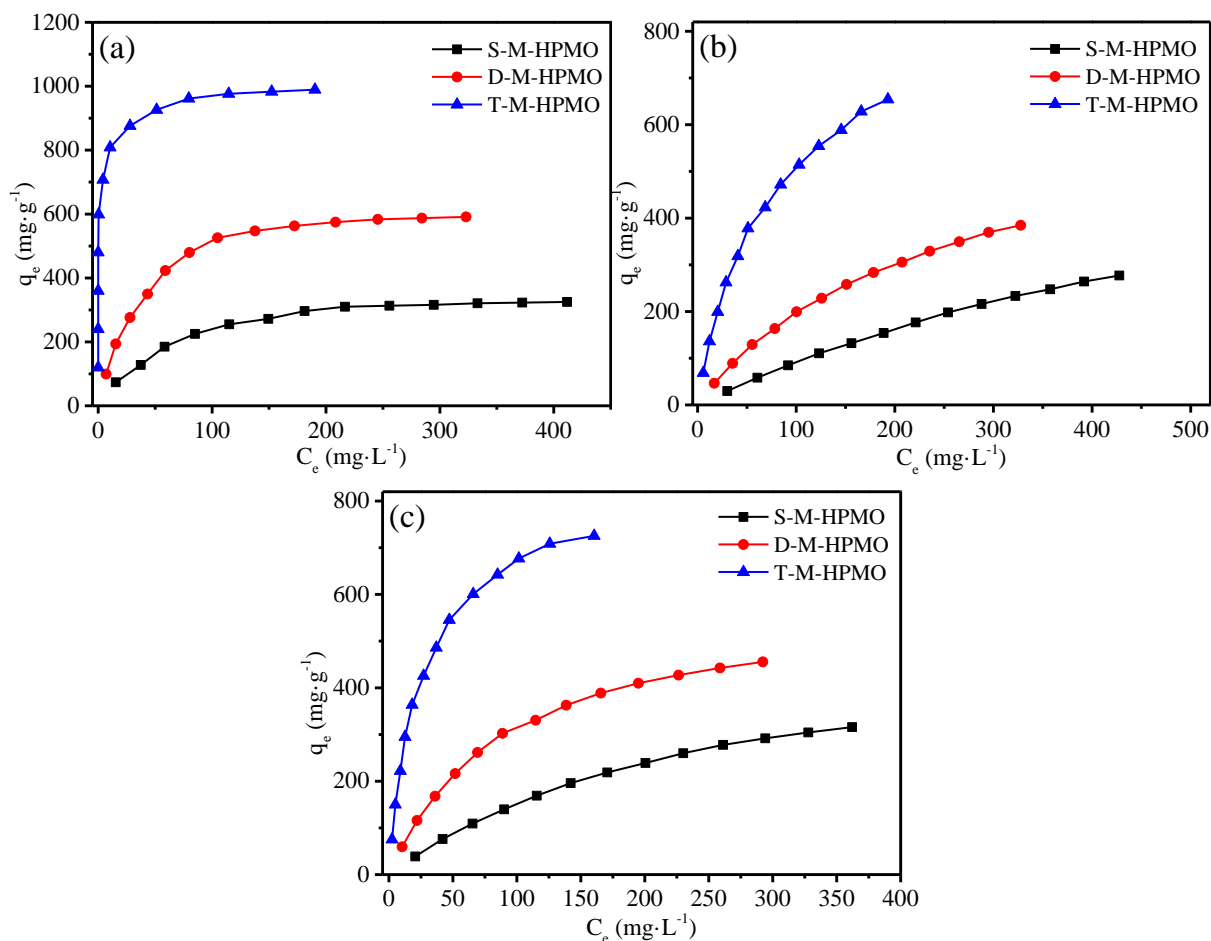

Fig. S3 The adsorption capacity of various organosilica for Hg(II) (a), Cr(VI) (b), and Pb(II) (c).

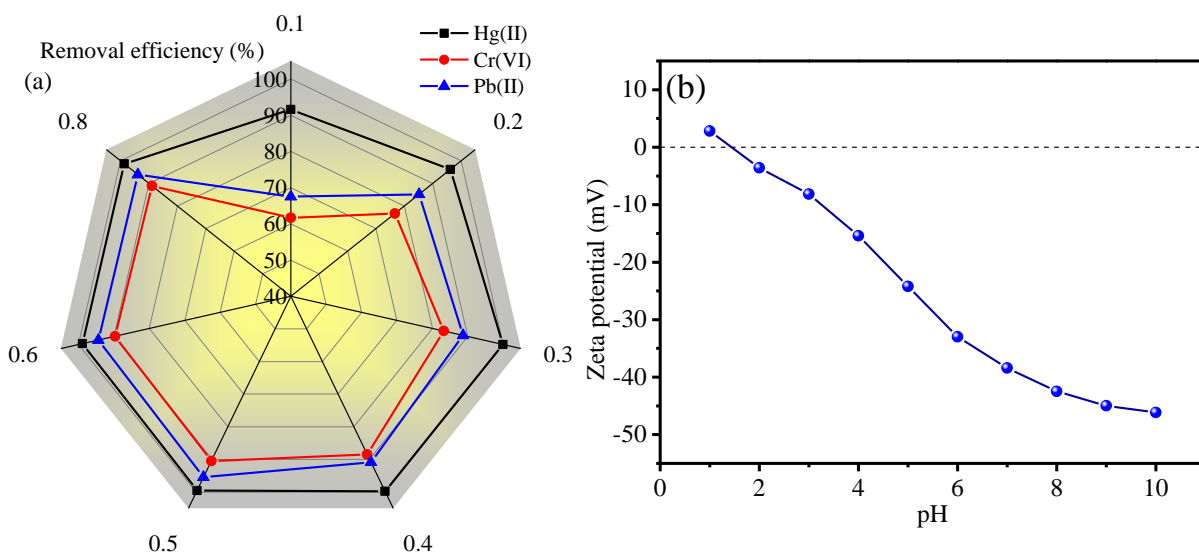

Fig. S4 The relationship between the removal efficiency and T-M-HPMO dosage (a) and the zeta potential of T-M-HPMO under different pH values (b).

Tab. S1 Parameters of adsorption isotherms of Hg(II), Cr(VI), and Pb(II)

| Ions    | $q_m$ (mg·g <sup>-1</sup> ) | $b$ (L·mg <sup>-1</sup> ) | $R^2$  |
|---------|-----------------------------|---------------------------|--------|
| Hg (II) | 990.19                      | 0.84                      | 0.9995 |
| Cr (VI) | 877.19                      | 0.02                      | 0.9984 |
| Pb (II) | 826.45                      | 0.04                      | 0.9987 |

Tab. S2 Comparison of adsorption performance for Pb (II) between T-M-HPMO and reported adsorbents

| Adsorbent                                  | Adsorption capacity            |                                     | Kinetics                                       |                           | Reference        |
|--------------------------------------------|--------------------------------|-------------------------------------|------------------------------------------------|---------------------------|------------------|
|                                            | $q_m$<br>(mg·g <sup>-1</sup> ) | $R_{S/L}$<br>(mg·mL <sup>-1</sup> ) | Initial concentration<br>(mg·L <sup>-1</sup> ) | Equilibrium time<br>(min) |                  |
| JUC-505-COOH                               | 559                            | 1/3                                 | 100                                            | < 5                       | [1]              |
| MnFe <sub>2</sub> O <sub>4</sub> @CAC      | 354                            | 1/2                                 | 400                                            | 720                       | [2]              |
| LDH@Fe <sub>2</sub> O <sub>3</sub> /3DPCNF | 426.76                         | 1/2                                 | 50                                             | 60                        | [3]              |
| L1@MNP                                     | 111.23                         | 1/2.5                               | 200                                            | 60                        | [4]              |
| MKa@CB                                     | 90.9                           | 1/0.5                               | 20                                             | 60                        | [5]              |
| Hydrogel/ $\beta$ CB                       | 505.9                          | 1/1                                 | 50                                             | 75                        | [6]              |
| MnxLa1-x@HTCC                              | 245.31                         | 1/4                                 | 100                                            | 60                        | [7]              |
| CSt-ZnO                                    | 256.4                          | 1/4                                 | 50                                             | 120                       | [8]              |
| T-M-HPMO                                   | 877.19                         | 1/2                                 | 320                                            | < 5                       | <b>This Work</b> |

Tab. S3 Comparison of adsorption performance for Cr (VI) between T-M-HPMO and reported adsorbents

| Adsorbent                                   | Adsorption capacity            |                                     | Kinetics                                       |                           | Reference        |
|---------------------------------------------|--------------------------------|-------------------------------------|------------------------------------------------|---------------------------|------------------|
|                                             | $q_m$<br>(mg·g <sup>-1</sup> ) | $R_{S/L}$<br>(mg·mL <sup>-1</sup> ) | Initial concentration<br>(mg·L <sup>-1</sup> ) | Equilibrium time<br>(min) |                  |
| GO-NH <sub>2</sub> -AHMT                    | 734.2                          | 1/2                                 | 104                                            | 100                       | [9]              |
| CS@BC/S-nZVI                                | 244.07                         | 1/2.5                               | 100                                            | 20                        | [10]             |
| LDH@Fe <sub>2</sub> O <sub>3</sub> /3DPCNF  | 400.40                         | 1/2                                 | 50                                             | 60                        | [3]              |
| MoS <sub>2</sub> @LDC                       | 198.7                          | 1/10                                | 20                                             | 40                        | [11]             |
| PPy/MoS <sub>2</sub>                        | 257.73                         | 1/0.33                              | 50                                             | 600                       | [12]             |
| Fe <sub>3</sub> O <sub>4</sub> /ZIF-67@AmCs | 119.05                         | 1/2                                 | 50                                             | 60                        | [13]             |
| BM-Fe-HC                                    | 48.8                           | 1/2                                 | 30                                             | 40                        | [14]             |
| LDH@LDC                                     | 274.48                         | 1/10                                | 60                                             | 60                        | [15]             |
| T-M-HPMO                                    | 826.45                         | 1/2                                 | 320                                            | < 5                       | <b>This Work</b> |

Tab. S4 Comparison of adsorption performance for Hg (II) between T-M-HPMO and reported adsorbents

| Adsorbent                                              | Adsorption capacity                        |                                                 | Kinetics                                                   |                           | Reference        |
|--------------------------------------------------------|--------------------------------------------|-------------------------------------------------|------------------------------------------------------------|---------------------------|------------------|
|                                                        | $q_m$<br>( $\text{mg}\cdot\text{g}^{-1}$ ) | $R_{S/L}$<br>( $\text{mg}\cdot\text{mL}^{-1}$ ) | Initial concentration<br>( $\text{mg}\cdot\text{L}^{-1}$ ) | Equilibrium time<br>(min) |                  |
| MOF-808-SH                                             | 977.5                                      | 1/5                                             | 10                                                         | < 5                       | [16]             |
| PCS-N <sub>2</sub>                                     | 721                                        | 1/4                                             | 25                                                         | 100                       | [17]             |
| Fe <sub>3</sub> O <sub>4</sub> @SiO <sub>2</sub> -G2-S | 605.8                                      | 1/0.83                                          | 200                                                        | 150                       | [18]             |
| UiO-66-DMTD                                            | 670.5                                      | 1/1.5                                           | 200                                                        | 180                       | [19]             |
| NHDA                                                   | 575.17                                     | 1/2.5                                           | 100                                                        | 40                        | [20]             |
| Fe <sub>3</sub> O <sub>4</sub> @SiO <sub>2</sub> @PTL  | 701.51                                     | 1/4                                             | 200                                                        | 10                        | [21]             |
| MSCTF-2                                                | 840.5                                      | 1/1.25                                          | 300                                                        | 360                       | [22]             |
| ZnS-zeolite NaA                                        | 553.24                                     | 1/2                                             | 110                                                        | 120                       | [23]             |
| T-M-HPMO                                               | 990.19                                     | 1/3                                             | 320                                                        | < 5                       | <b>This Work</b> |

Tab. S5 Thermodynamic parameters of Hg(II), Cr(VI), and Pb(II)

| Ions    | $\Delta G$ ( $\text{kJ}\cdot\text{mol}^{-1}$ ) |       |       | $\Delta H$ ( $\text{kJ}\cdot\text{mol}^{-1}$ ) | $\Delta S$ ( $\text{kJ}\cdot\text{mol}^{-1}\cdot\text{K}^{-1}$ ) | $R^2$  |
|---------|------------------------------------------------|-------|-------|------------------------------------------------|------------------------------------------------------------------|--------|
|         | 288 K                                          | 298 K | 308 K |                                                |                                                                  |        |
| Hg (II) | -2.82                                          | -3.75 | -4.79 | 30.31                                          | 114.94                                                           | 0.9942 |
| Cr (VI) | -0.87                                          | -2.29 | -3.53 | 39.65                                          | 140.64                                                           | 0.9992 |
| Pb (II) | -1.31                                          | -3.09 | -4.57 | 46.94                                          | 167.36                                                           | 0.9978 |

Tab. S6 Kinetic parameters of Hg(II), Cr(VI), and Pb(II)

| Ions    | $q_{e, exp}$ ( $\text{mg}\cdot\text{g}^{-1}$ ) | $q_e$ ( $\text{mg}\cdot\text{g}^{-1}$ ) | $k$ ( $\text{mg}\cdot\text{g}^{-1}\cdot\text{min}^{-1}$ ) | $R^2$  | $t_{95\%}$ (min) |
|---------|------------------------------------------------|-----------------------------------------|-----------------------------------------------------------|--------|------------------|
| Hg (II) | 876.93                                         | 877.19                                  | 0.014                                                     | 0.9999 | 2.22             |
| Cr (VI) | 479.87                                         | 480.77                                  | 0.019                                                     | 0.9999 | 4.76             |
| Pb (II) | 542.9                                          | 543.48                                  | 0.016                                                     | 0.9999 | 4.68             |

Tab. S7 Adsorption of Hg(II), Cr(VI) and Pb(II) on T-M-HPMO in the presence of interfering ions

| Interfering ions | $C_0$ (mg·L <sup>-1</sup> ) | $C_e$ (mg·L <sup>-1</sup> ) | Removal efficiency (%) | $K_d^M$ (mL·g <sup>-1</sup> ) | $f$                |
|------------------|-----------------------------|-----------------------------|------------------------|-------------------------------|--------------------|
| Hg (II)          | 200                         | 0.42                        | 99.79                  | $1.43 \times 10^6$            | 1                  |
| Pb (II)          | 200                         | 18.16                       | 90.92                  | $3.01 \times 10^4$            | 47.46              |
| Cr (VI)          | 200                         | 40.81                       | 79.59                  | $1.17 \times 10^4$            | 121.82             |
| Zn (II)          | 200                         | 196.44                      | 1.78                   | 54.36                         | $2.62 \times 10^4$ |
| Cu (II)          | 200                         | 195.76                      | 2.12                   | 64.98                         | $2.19 \times 10^4$ |
| Co (II)          | 200                         | 196.08                      | 1.96                   | 59.98                         | $2.38 \times 10^4$ |
| Ni (II)          | 200                         | 196.50                      | 1.75                   | 53.43                         | $2.67 \times 10^4$ |
| Ca (II)          | 200                         | 191.48                      | 4.26                   | 133.48                        | $1.07 \times 10^4$ |
| Na (I)           | 200                         | 192.44                      | 3.78                   | 117.85                        | $1.21 \times 10^4$ |
| K (I)            | 200                         | 193.76                      | 3.12                   | 96.61                         | $1.48 \times 10^4$ |
| Mg (II)          | 200                         | 193.84                      | 3.08                   | 95.34                         | $1.50 \times 10^4$ |
| Ba (II)          | 200                         | 196.32                      | 1.84                   | 56.23                         | $2.54 \times 10^4$ |

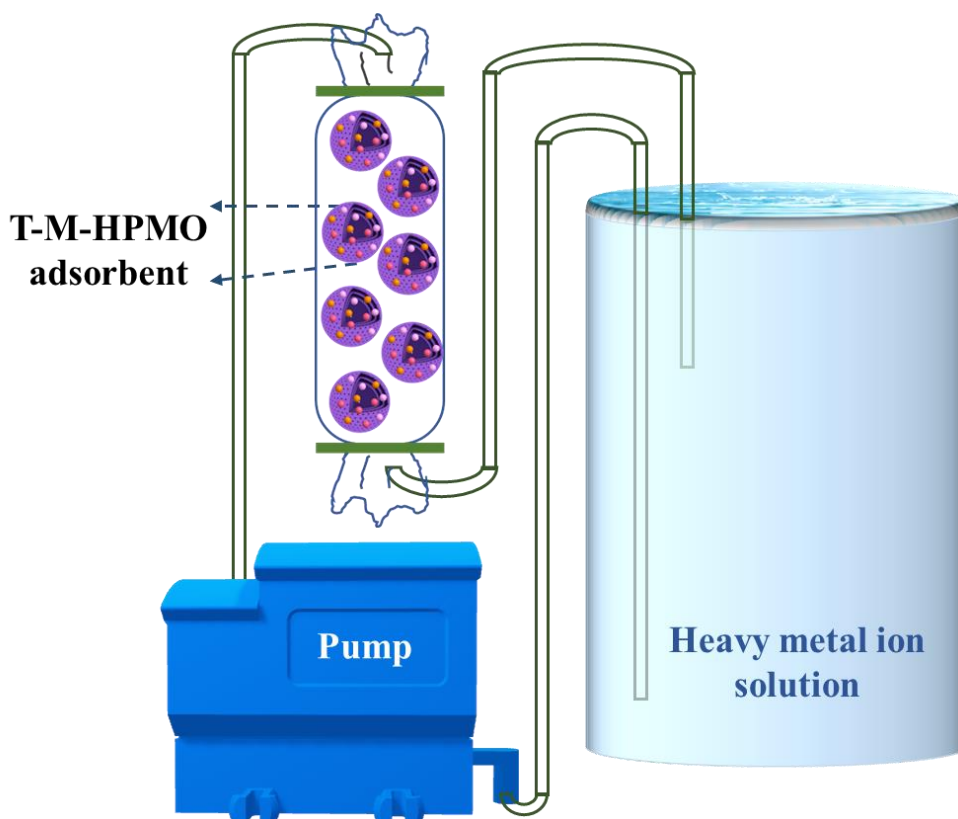

Fig. S5 Equipment applied for removal of trace metal ions.

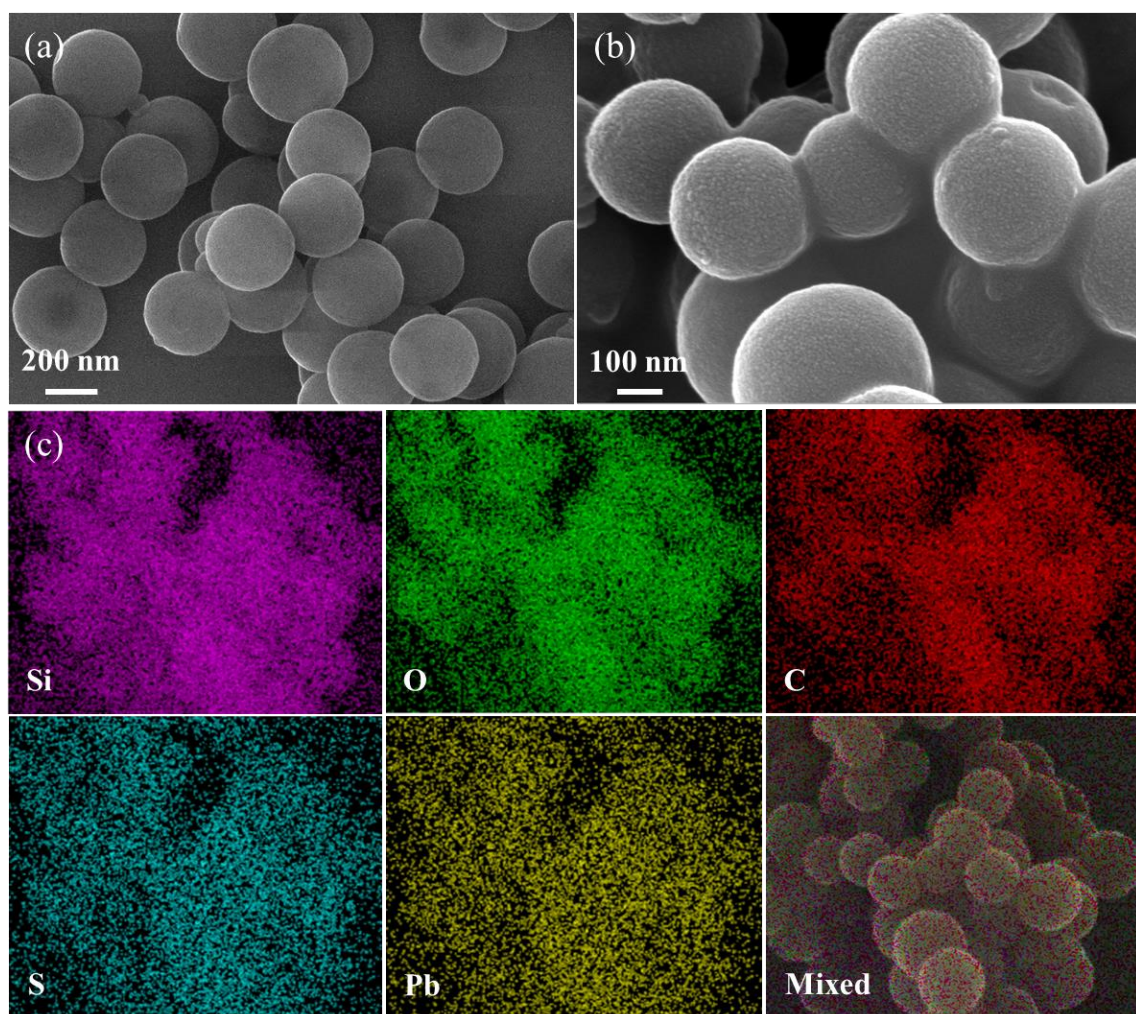

Fig. S6 SEM of T-M-HPMO after adsorption of Pb(II) (a, b), element mapping (c).

Tab. S8 Pore parameters of different organosilica adsorbents before and after adsorption

| Sample      | BET surface area ( $\text{m}^2 \cdot \text{g}^{-1}$ ) | Pore volume ( $\text{cm}^3 \cdot \text{g}^{-1}$ ) |
|-------------|-------------------------------------------------------|---------------------------------------------------|
| S-M-HPMO    | 428.21                                                | 0.40                                              |
| D-M-HPMO    | 524.77                                                | 0.50                                              |
| T-M-HPMO    | 623.36                                                | 0.63                                              |
| T-M-HPMO-Hg | 302.34                                                | 0.30                                              |
| T-M-HPMO-Cr | 427.13                                                | 0.41                                              |
| T-M-HPMO-Pb | 475.46                                                | 0.44                                              |

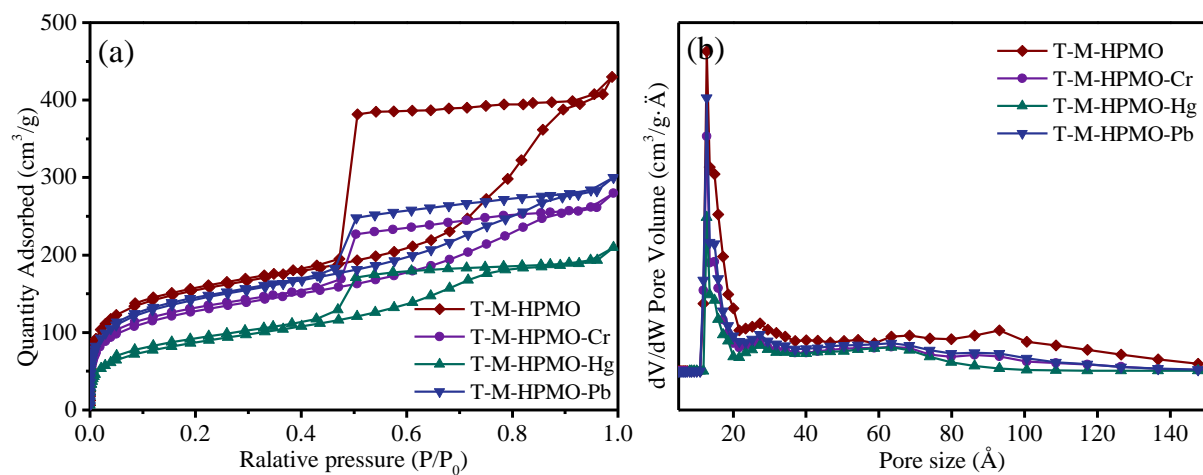

Fig. S7  $\text{N}_2$  adsorption isotherm.

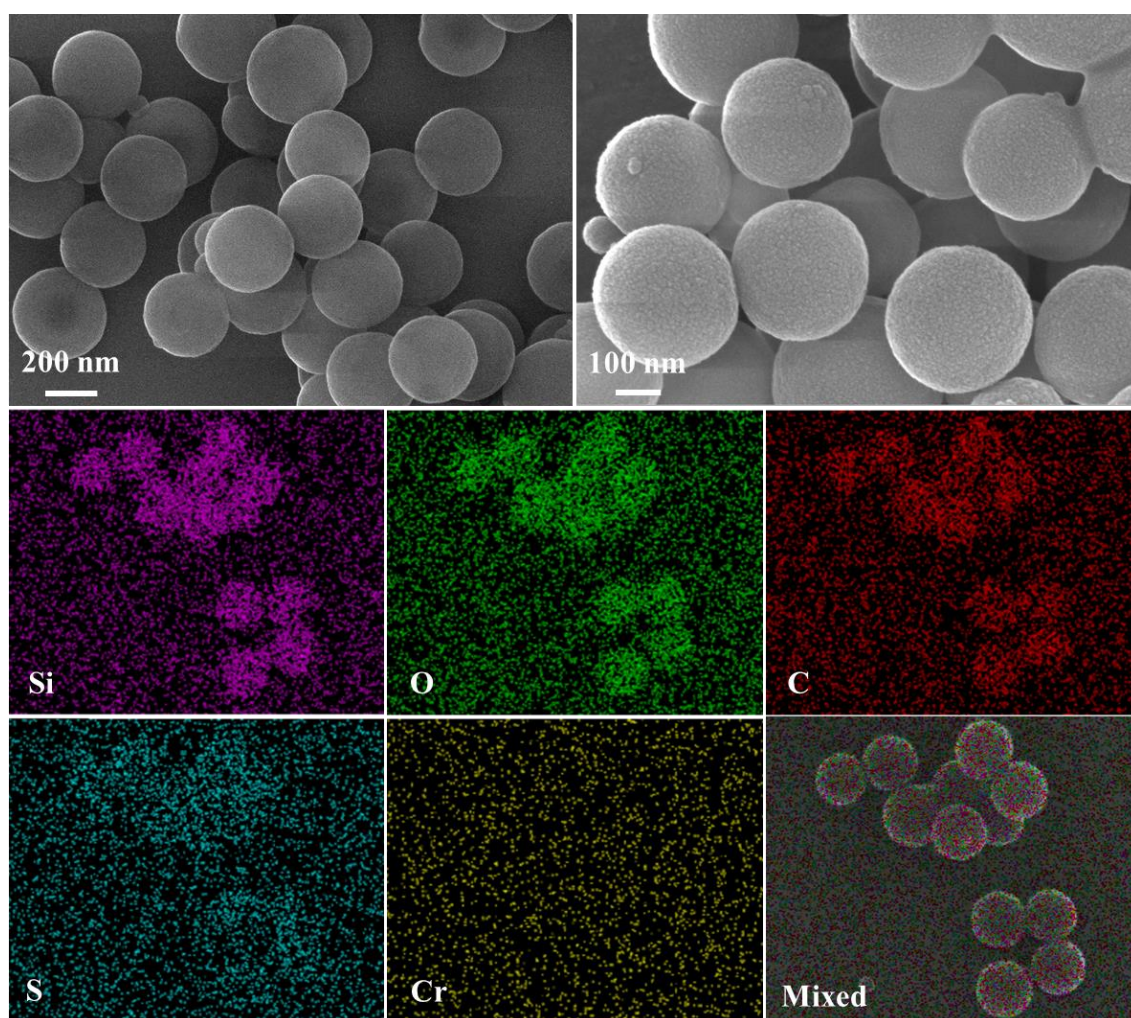

Fig. S8 SEM of T-M-HPMO after adsorption of  $\text{Cr(VI)}$  (a, b), element mapping (c).



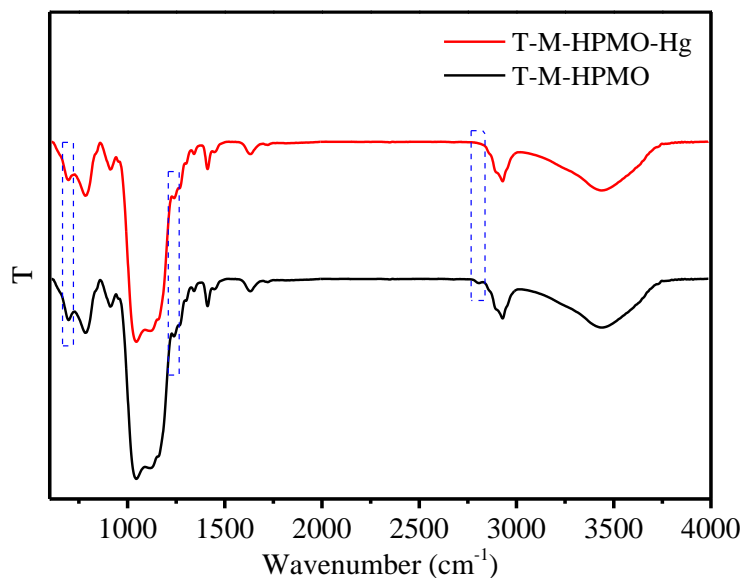

Fig. S9 FTIR of T-M-HPMO and T-M-HPMO-Hg.

## References

- [1] R. Zhu, P. Zhang, X. Zhang, M. Yang, R. Zhao, W. Liu, Z. Li, Fabrication of synergistic sites on an oxygen-rich covalent organic framework for efficient removal of Cd (II) and Pb (II) from water, *Journal of Hazardous Materials* 424 (2022) 127301.
- [2] Q. Chen, Z. Tang, H. Li, M. Wu, Q. Zhao, B. Pan, An electron-scale comparative study on the adsorption of six divalent heavy metal cations on MnFe<sub>2</sub>O<sub>4</sub>@CAC hybrid: Experimental and DFT investigations, *Chemical Engineering Journal* 381 (2020) 122656.
- [3] M.B. Poudel, G.P. Awasthi, H.J. Kim, Novel insight into the adsorption of Cr (VI) and Pb (II) ions by MOF derived Co-Al layered double hydroxide@ hematite nanorods on 3D porous carbon nanofiber network, *Chemical Engineering Journal* 417 (2021) 129312.
- [4] X. Zhou, C. Jin, G. Liu, G. Wu, S. Huo, Z. Kong, Functionalized lignin-based magnetic adsorbents with tunable structure for the efficient and selective removal of Pb(II) from aqueous solution, *Chemical Engineering Journal* 420 (2021) 130409.
- [5] S.S. Elanchezhian, P. Karthikeyan, K. Rathinam, M. Hasmath Farzana, C.M. Park, Magnetic kaolinite immobilized chitosan beads for the removal of Pb(II) and Cd(II) ions from an aqueous environment, *Carbohydrate Polymers* 261 (2021) 117892.
- [6] Z. Wang, T.-T. Li, H.-K. Peng, H.-T. Ren, C.-W. Lou, J.-H. Lin, Low-cost hydrogel adsorbent enhanced by trihydroxy melamine and  $\beta$ -cyclodextrin for the removal of Pb(II) and

Ni(II) in water, *Journal of Hazardous Materials* 411 (2021) 125029.

[7] Y. Xue, W. Teng, Y. Chen, Q. Ma, X. Chen, Y. Sun, J. Fan, Y. Qiu, R. Fu, Amorphous Mn-La oxides immobilized on carbon sphere for efficient removal of As(V), Cd(II), and Pb(II): Co-adsorption and roles of Mn species, *Chemical Engineering Journal* 429 (2022) 132262.

[8] M. Naushad, T. Ahamad, K.M. Al-Sheetan, Development of a polymeric nanocomposite as a high performance adsorbent for Pb(II) removal from water medium: Equilibrium, kinetic and antimicrobial activity, *Journal of Hazardous Materials* 407 (2021) 124816.

[9] S. Bao, Y. Wang, Z. Wei, W. Yang, Y. Yu, Y. Sun, Amino-assisted AHMT anchored on graphene oxide as high performance adsorbent for efficient removal of Cr(VI) and Hg(II) from aqueous solutions under wide pH range, *Journal of Hazardous Materials* 416 (2021) 125825.

[10] H. Xu, M. Gao, X. Hu, Y. Chen, Y. Li, X. Xu, R. Zhang, X. Yang, C. Tang, X. Hu, A novel preparation of S-nZVI and its high efficient removal of Cr(VI) in aqueous solution, *Journal of Hazardous Materials* 416 (2021) 125924.

[11] H. Chen, Z. Zhang, X. Zhong, Z. Zhuo, S. Tian, S. Fu, Y. Chen, Y. Liu, Constructing MoS<sub>2</sub>/Lignin-derived carbon nanocomposites for highly efficient removal of Cr(VI) from aqueous environment, *Journal of Hazardous Materials* 408 (2021) 124847.

[12] L. Xiang, C.-G. Niu, N. Tang, X.-X. Lv, H. Guo, Z.-W. Li, H.-Y. Liu, L.-S. Lin, Y.-Y. Yang, C. Liang, Polypyrrole coated molybdenum disulfide composites as adsorbent for enhanced removal of Cr(VI) in aqueous solutions by adsorption combined with reduction, *Chemical Engineering Journal* 408 (2021) 127281.

[13] A.M. Omer, E.M. Abd El-Monaem, M.M. Abd El-Latif, G.M. El-Subruiti, A.S. Eltaweil, Facile fabrication of novel magnetic ZIF-67 MOF@aminated chitosan composite beads for the adsorptive removal of Cr(VI) from aqueous solutions, *Carbohydrate Polymers* 265 (2021) 118084.

[14] H. Zou, J. Zhao, F. He, Z. Zhong, J. Huang, Y. Zheng, Y. Zhang, Y. Yang, F. Yu, M.A. Bashir, B. Gao, Ball milling biochar iron oxide composites for the removal of chromium (Cr(VI)) from water: Performance and mechanisms, *Journal of Hazardous Materials* 413 (2021) 125252.

[15] H. Chen, Z. Gong, Z. Zhuo, X. Zhong, M. Zhou, X. Xiang, Z. Zhang, Y. Liu, Y. Chen, Tuning the defects in lignin-derived-carbon and trimetallic layered double hydroxides

composites (LDH@LDC) for efficient removal of U(VI) and Cr(VI) in aquatic environment, *Chemical Engineering Journal* 428 (2022) 132113.

[16] C. Ji, Y. Ren, H. Yu, M. Hua, L. Lv, W. Zhang, Highly efficient and selective Hg (II) removal from water by thiol-functionalized MOF-808: Kinetic and mechanism study, *Chemical Engineering Journal* 430 (2022) 132960.

[17] Q. Ge, H. Liu, Tunable amine-functionalized silsesquioxane-based hybrid networks for efficient removal of heavy metal ions and selective adsorption of anionic dyes, *Chemical Engineering Journal* 428 (2022) 131370.

[18] Y. Zhou, L. Luan, B. Tang, Y. Niu, R. Qu, Y. Liu, W. Xu, Fabrication of Schiff base decorated PAMAM dendrimer/magnetic Fe<sub>3</sub>O<sub>4</sub> for selective removal of aqueous Hg (II), *Chemical Engineering Journal* 398 (2020) 125651.

[19] L. Fu, S. Wang, G. Lin, L. Zhang, Q. Liu, J. Fang, C. Wei, G. Liu, Post-functionalization of UiO-66-NH<sub>2</sub> by 2,5-Dimercapto-1,3,4-thiadiazole for the high efficient removal of Hg(II) in water, *Journal of Hazardous Materials* 368 (2019) 42-51.

[20] Q. Zeng, L. Hu, H. Zhong, Z. He, W. Sun, D. Xiong, Efficient removal of Hg<sup>2+</sup> from aqueous solution by a novel composite of nano humboldtine decorated almandine (NHDA): Ion exchange, reducing-oxidation and adsorption, *Journal of Hazardous Materials* 404 (2021) 124035.

[21] Y. Sun, X. Li, W. Zheng, Facile synthesis of core-shell phase-transited lysozyme coated magnetic nanoparticle as a novel adsorbent for Hg(II) removal in aqueous solutions, *Journal of Hazardous Materials* 403 (2021) 124012.

[22] Z. Yang, Y. Gu, B. Yuan, Y. Tian, J. Shang, D.C.W. Tsang, M. Liu, L. Gan, S. Mao, L. Li, Thio-groups decorated covalent triazine frameworks for selective mercury removal, *Journal of Hazardous Materials* 403 (2021) 123702.

[23] Y. Li, L. Yang, X. Li, T. Miki, T. Nagasaka, A composite adsorbent of ZnS nanoclusters grown in zeolite NaA synthesized from fly ash with a high mercury ion removal efficiency in solution, *Journal of Hazardous Materials* 411 (2021) 125044.
